# Supplementary material for: NH3assisted photoreduction and N-doping of graphene oxide for high performance electrode materials in supercapacitors
Source: Royal Society of Chemistry journal article supplement (doi:10.1039/c4nr05776g), 2014-11-21
Supplement: c4nr05776g1.pdf [file c4nr05776g1.pdf]

Electronic Supplementary Information (ESI)

## NH<sub>3</sub> assisted Photoreduction and N-doping of Graphene oxide as High Performance of Electrode Material for Supercapacitors Application

Haifu Huang,<sup>a</sup> Guangsheng Luo,<sup>a,b</sup> Lianqiang Xu,<sup>a</sup> Chenglong Lei,<sup>a</sup> Yanmei Tang,<sup>a,c</sup> Shaolong Tang<sup>\*a</sup>  
5 and Youwei Du<sup>a</sup>

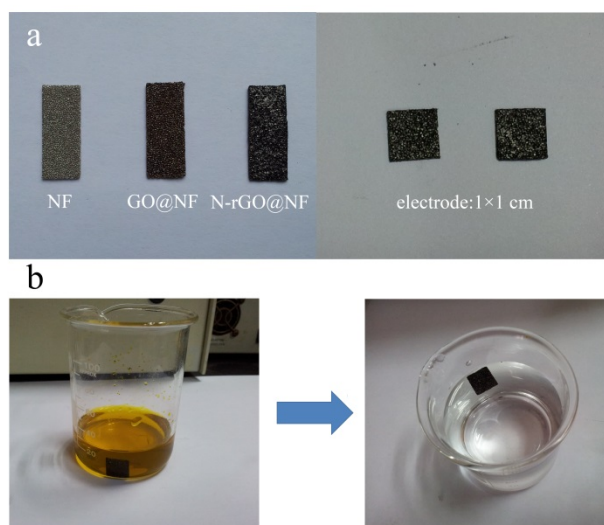

**Fig. S1** (a) Digital photographs of nickel foam, GO deposited in nickel foam, N-rGO@NF, and N-rGO@NF electrodes (1.0 cm x 1.0), (b) Digital photographs: (1) N-rGO@NF sheet was put into 1 M FeCl<sub>3</sub> at room temperature dissolve the Ni metal and (2) a whole N-rGO sheet without Ni foam support after nickel etching

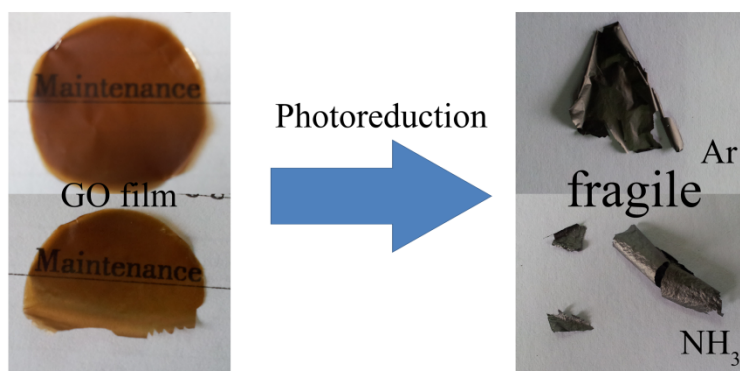

**Fig. S2** Photograph of film before and after irradiated by a high-pressure Hg lamp (500 W) in Ar and NH<sub>3</sub> atmosphere.
